# Supplementary material
Source: publisher site journal article supplement (https://www.spandidos-publications.com/3560/downloadSupplementary)

Figure S1. Transfection efficiency results of sh-AQP1 and sh-NC. \*\* $P < 0.01$ . AQP1 aquaporin 1; sh-, short hairpin RNA; NC, negative control.

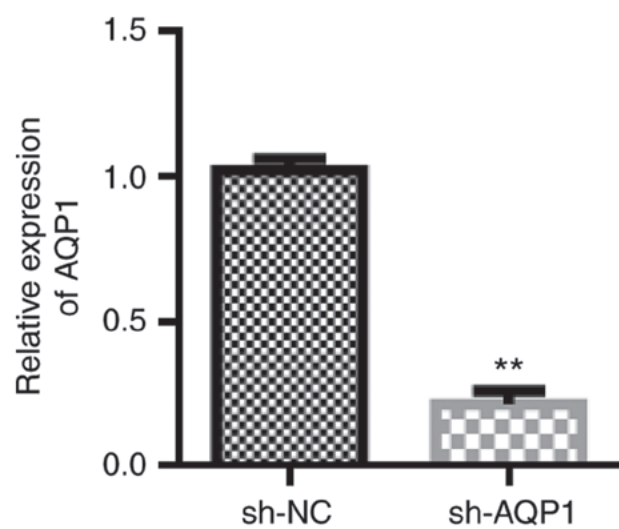

Supplement: Supplementary file 1 [file downloadSupplementary]
